# Supplementary material
Source: Frontiers journal article supplement (https://www.frontiersin.org/articles/345847)
Supplement: Image_1.PDF [file Image_1.PDF]

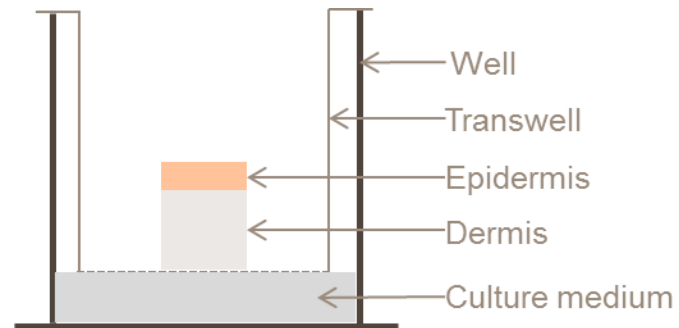

Figure 1. A schematic diagram showing how a human skin biopsy is maintained at air-liquid interface in a transwell filter.
